# Supplementary material for: GroEL triggers NLRP3 inflammasome activation through the TLR/NF-κB p-p65 axis in human periodontal ligament stem cells: GroEL triggers NLRP3 inflammasome activation
Source: PubMed Central journal article supplement (PMC11532219; doi:10.3724/abbs.2024050), 2024-04-10
Supplement: 24028Supplementary_materials.pdf [file 24028Supplementary_materials.pdf]

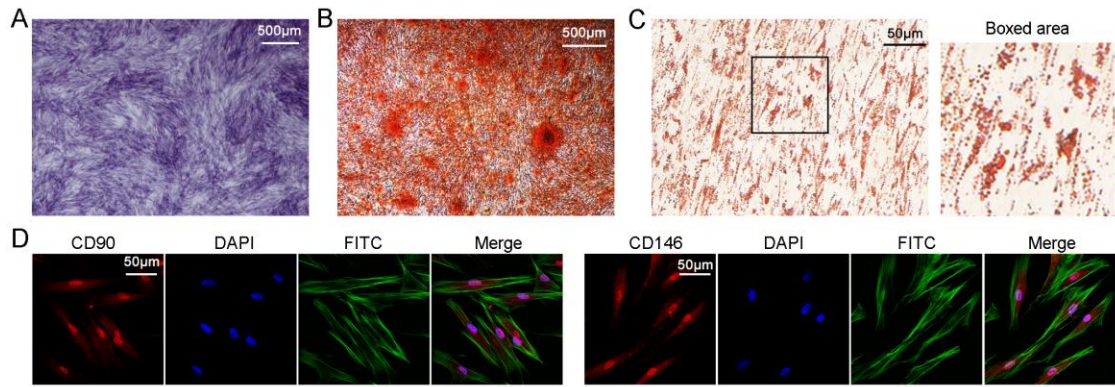

**Supplementary Figure S1. The stemness characterization of hPDLSCs** (A,B) The osteogenic differentiation capacity of hPDLSCs was evaluated using ALP staining (A) and Alizarin Red staining (B). (C) The adipogenesis capacity of hPDLSCs was evaluated using Oil Red O staining. (D) Immunofluorescence images showing the positive expression of CD90 and CD146 in harvested hPDLSCs. The data were derived from three independent experiments ( $n=3$ ). CD90 and CD146, red; F-actin, green; nucleus, blue.

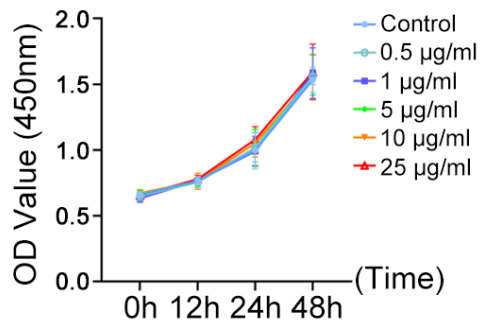

**Supplementary Figure S2. Effects of GroEL on the cell viability of hPDLSCs** Cell Counting Kit-8 (CCK8) assay showing the cytotoxicity of the GroEL on hPDLSCs. Different concentrations (0, 0.5, 1, 5, 10 and 25 μg/mL) of GroEL showed no significant impact on the cell viability of hPDLSCs.

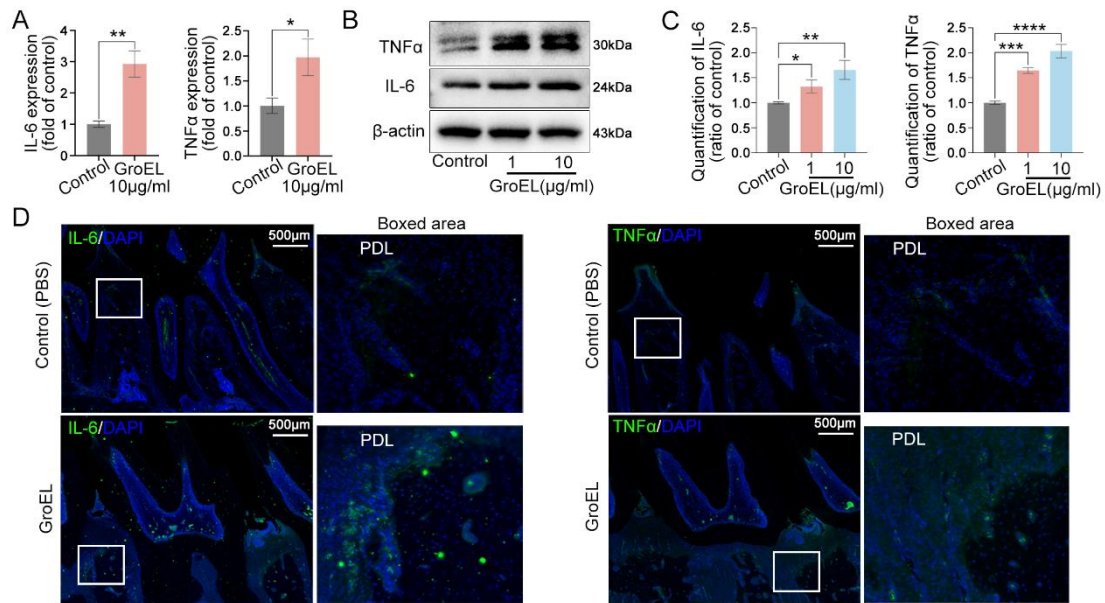

**Supplementary Figure S3. GroEL induces the expressions of IL-6 and TNF- $\alpha$  in hPDLSCs**

(A) qPCR showing the mRNA expressions of IL-6 and TNF- $\alpha$  in hPDLSCs induced by GroEL. The data were derived from three independent experiments ( $n=3$ ). \*\*\* $P<0.001$ , \*\*\*\* $P<0.0001$ . (B) Western blot images showing protein expressions of IL-6 and TNF- $\alpha$  in hPDLSCs treated with GroEL. The images are representative of three independent experiments ( $n=3$ ). (C) Quantitative analysis confirming the protein changes in (B). Relative protein expressions were normalized with  $\beta$ -actin. The data were derived from three independent experiments ( $n=3$ ). \*\* $P<0.01$ , \*\*\*\* $P<0.0001$ . (D) Immunofluorescence images showing the increased expressions of IL-6 and TNF- $\alpha$  in rat periodontal tissues post injection with GroEL for 4 weeks. IL-6 and TNF- $\alpha$ , green; nucleus, blue. The data were derived from four independent experiments ( $n=4$ ).

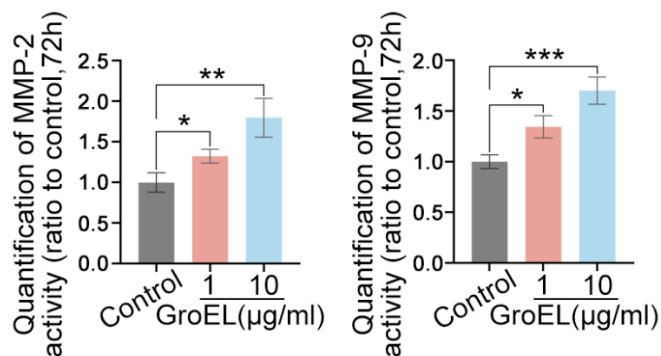

**Supplementary Figure S4. Quantitative analysis of the activities of MMP-2 and MMP-9 in hPDLSCs induced by GroEL for 72 h** The data were derived from three independent experiments ( $n=3$ ).  $*P<0.05$ ,  $**P<0.01$ ,  $***P<0.001$ .

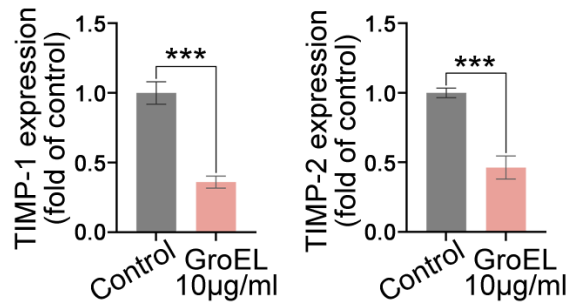

**Supplementary Figure S5. qPCR results showing the mRNA expressions of TIMP-1 and TIMP-2 in hPDLSCs induced by GroEL** The data were derived from three independent experiments ( $n=3$ ).  $***P<0.001$ .

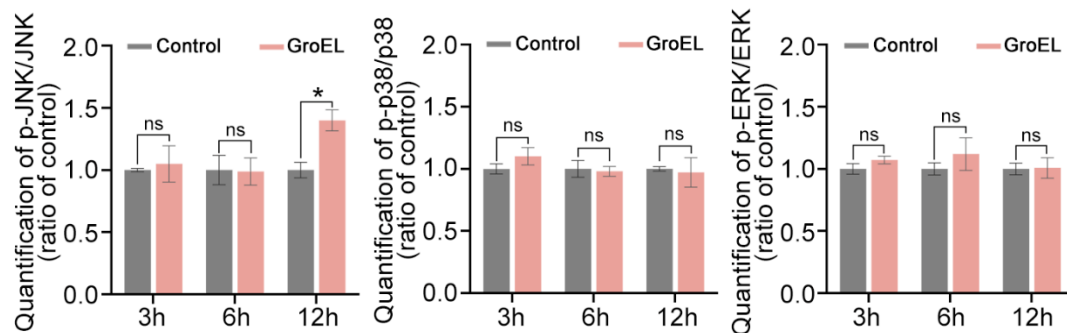

**Supplementary Figure S6. Quantitative analysis of p-JNK/JNK, p-p38/p38 and p-Erk1/2/Erk1/2 in Figure 3A** The data were derived from three independent experiments ( $n=3$ ).  $*P<0.05$ .

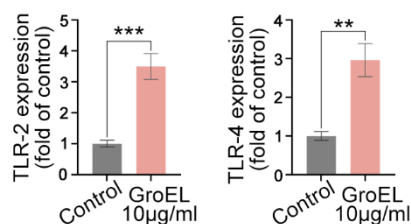

**Supplementary Figure S7. Expressions of TLR2 and TLR4 mRNA in GroEL-stimulated hPDLSCs** qPCR showing the mRNA expressions of TLR-2 and TLR-4 in hPDLSCs induced

by GroEL for 12 h. The data were derived from three independent experiments ( $n=3$ ).  $**P<0.01$ ,  $***P<0.001$ .

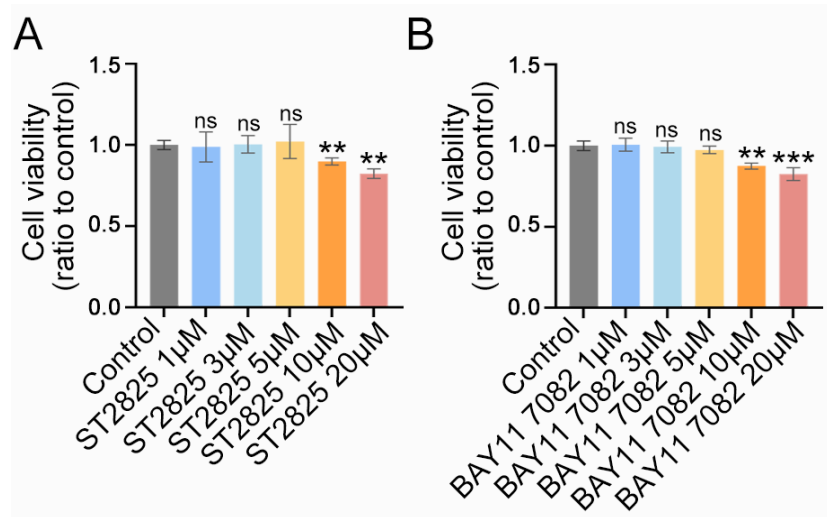

**Supplementary Figure S8. Effects of ST2825 and BAY11-7082 on the cell viability of hPDLSCs** (A) Cell Counting Kit-8 (CCK8) assay showing the cytotoxicity of ST2825 at different concentrations (0, 1, 3, 5, 10 and 20  $\mu\text{M}$ ) on hPDLSCs. The data were derived from three independent experiments ( $n=3$ ).  $**P<0.01$ . (B) Cell Counting Kit-8 (CCK8) assay showing cytotoxicity of BAY11-7082 at different concentrations (0, 1, 3, 5, 10 and 20  $\mu\text{M}$ ) on hPDLSCs. The data were derived from three independent experiments ( $n=3$ ).  $**P<0.01$ ,  $***P<0.001$ .

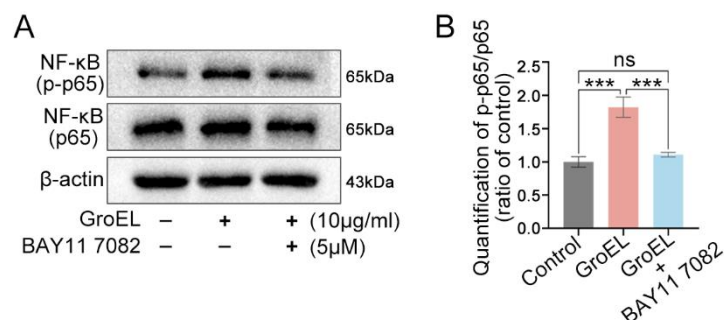

**Supplementary Figure S9. The specific inhibitor BAY11 7082 shows a strong inhibitory effect of NF- $\kappa$ B signaling in the presence of GroEL** (A) Western blot images showing the protein expression of NF- $\kappa$ B (total p65 and p-p65) in hPDLSCs treated with BAY11-7082 in the presence of GroEL. The images are representative of three independent experiments ( $n=3$ ). (B)

Quantitative analysis confirming the protein changes in (A). Relative protein expressions were normalized with  $\beta$ -actin. The data were derived from three independent experiments ( $n=3$ ).

\*\*\* $P<0.001$ .

**Supplementary Table S1. Sequences of primer pairs used in the study**

| Protein name                             | Gene name/gene ID                              | Primer sequence (5'→3')                                             |
|------------------------------------------|------------------------------------------------|---------------------------------------------------------------------|
| Glyceraldehyde-3-phosphate dehydrogenase | <i>GAPDH</i><br>(NM_001256799.3)               | Forward: GACAGTCAGCCGCATCTTCT<br>Reverse: GCGCCCAATACGACCAAATC      |
| NLR family pyrin domain containing 3     | <i>NLRP3</i><br>(NM_001079821.3)               | Forward: TGGCATCGTGAAGTGGTTGT<br>Reverse: AGCCAAATGCTTACCAGAAAGT    |
| PYD and CARD domain containing           | <i>ASC</i><br>(NM_013258.5)                    | Forward: TGGATGCTCTGTACGGGAAG<br>Reverse: CCAGGCTGGTGTGAAACTGAA     |
| Caspase 1                                | <i>CASP1</i><br>(NM_001223.5)                  | Forward: TCCAATAATGGACAAGTCAAGCC<br>Reverse: GCTGTACCCAGATTTTGTAGCA |
| Interleukin 1 beta                       | <i>IL1<math>\beta</math></i><br>(NM_000576.3)  | Forward: AGCTACGAATCTCCGACCAC<br>Reverse: CGTTATCCCATGTGTGCGAAGAA   |
| Interleukin 18                           | <i>IL18</i><br>(NM_001243211.2)                | Forward: TCTTCATTGACCAAGGAAATCGG<br>Reverse: TCCGGGGTGCATTATCTCTAC  |
| Interleukin 6                            | <i>IL6</i><br>(NM_001371096.1)                 | Forward: CCTGAACCTTCCAAGATGGC<br>Reverse: TTCACCAGGCAAGTCTCCTCA     |
| Tumor necrosis factor                    | <i>TNF<math>\alpha</math></i><br>(NM_000594.4) | Forward: CCTCTCTCTAATCAGCCCTCTG<br>Reverse: GAGGACCTGGGAGTAGATGAG   |
| Toll like receptor 2                     | <i>TLR2</i><br>(NM_001318787.2)                | Forward: ATCCTCCAATCAGGCTTCTCT<br>Reverse: GGACAGGTCAAGGCTTTTTACA   |
| Toll like receptor 4                     | <i>TLR4</i><br>(NM_003266.4)                   | Forward: CTTGGCCCTAAACCACACAGA<br>Reverse: CAATGGAATCGGGGTGAAGG     |
| Matrix metalloproteinase 2               | <i>MMP2</i><br>(NM_001302510.2)                | Forward: GATACCCCTTTGACGGTAAGGA<br>Reverse: CCTTCTCCCAAGGTCCATAGC   |

---

|                                         |                               |                                                                            |
|-----------------------------------------|-------------------------------|----------------------------------------------------------------------------|
| Matrix metalloproteinase 9              | <i>MMP9</i><br>(NM_004994.3)  | Forward: CGCAGACATCGTCATCCAGT<br>Reverse: GAAATGGGCGTCTCCCTGAA             |
| Tissue inhibitor of metalloproteinase 1 | <i>TIMP1</i><br>(NM_003254.3) | Forward: AAT TCC GAC CTC GTC ATC AG<br>Reverse: GTT TGC AGG GGA TGG ATA AA |
| Tissue inhibitor of metalloproteinase 2 | <i>TIMP2</i><br>(NM_003255.5) | Forward: CTG GAC GTT GGA GGA AAG AA<br>Reverse: GTC GAG AAA CTC CTG CTT GG |

---
